# Supplementary material for: The Young Parenting Inventory (YPI-R3), and the Baumrind, Maccoby and Martin Parenting Model: Finding Common Ground
Source: MDPI journal article supplement (doi:10.3390/children9020159), 2022-01-26
Supplement: s1 [file s1]

## Supplementary Material

**Table S1.** Descriptive Statistics of YPI-R3 Subscales Using Singapore Mothers Sample.

|                   | OC    | EID   | UI    | OO    | NIG   | CSS   | IE    | DR    | SE    | PA    |
|-------------------|-------|-------|-------|-------|-------|-------|-------|-------|-------|-------|
| Size ( <i>n</i> ) | 628   | 628   | 628   | 628   | 628   | 628   | 628   | 628   | 628   | 628   |
| Mean              | 2.794 | 3.306 | 1.877 | 2.290 | 3.055 | 2.950 | 1.466 | 2.355 | 2.441 | 2.496 |
| Kurtosis          | -.463 | -.638 | 2.028 | .422  | -.829 | -.633 | 5.479 | .107  | .035  | .170  |
| Skewness          | .575  | .176  | 1.353 | .893  | .214  | .389  | 2.149 | .925  | .793  | .978  |

**Table S2.** Descriptive Statistics of YPI-R3 Subscales Using Singapore Fathers Sample

|                   | OC    | EID   | UI    | OO    | NIG   | CSS   | IE    | DR    | SE    | PA    |
|-------------------|-------|-------|-------|-------|-------|-------|-------|-------|-------|-------|
| Size ( <i>n</i> ) | 592   | 592   | 592   | 592   | 592   | 592   | 592   | 592   | 592   | 592   |
| Mean              | 2.605 | 3.506 | 2.082 | 2.009 | 3.287 | 2.751 | 1.483 | 2.294 | 2.624 | 2.333 |
| Kurtosis          | .154  | -.808 | 1.065 | .918  | -.862 | -.226 | 5.052 | .308  | -.449 | .493  |
| Skewness          | .883  | .001  | 1.251 | 1.030 | .163  | .598  | 2.076 | 1.052 | .636  | 1.115 |

OC=Over-Control

EID=Emotional Inhibition and Deprivation

UI=Undependability and Irresponsibility

OO=Overprotection and Overindulgence

NIG=Neglect and Insufficient Guidance

CSS=Competitiveness and Status Seeking

IE=Intrusiveness and Exploitation

DR=Degradation and Rejection

SE=Social Exclusion

PA=Punitiveness and Abuse

**Table S3**

Pearson's Correlation Between the First Order YPI-R3 Constructs for Singapore Mothers Sample (*n*=628).

|     | OC     | EID    | UI     | OO     | NIG     | CSS     | IE     | DR     | SE     | PA     |
|-----|--------|--------|--------|--------|---------|---------|--------|--------|--------|--------|
| OC  | 1      | .371** | .313** | .081*  | .010    | .594**  | .452** | .705** | .350** | .703** |
| EID | .371** | 1      | .257** | -.048  | .415**  | .152**  | .331** | .444** | .482** | .481** |
| UI  | .313** | .257** | 1      | .105** | .388**  | .138**  | .427** | .298** | .306** | .350** |
| OO  | .081*  | -.048  | .105** | 1      | .073    | .197**  | .025   | .018   | .109** | -.092* |
| NIG | .010   | .415** | .388** | .073   | 1       | -.181** | .195** | .126** | .289** | .147** |
| CSS | .594** | .152** | .138** | .197** | -.181** | 1       | .288** | .533** | .248** | .424** |
| IE  | .452** | .331** | .427** | .025   | .195**  | .288**  | 1      | .508** | .364** | .525** |
| DR  | .705** | .444** | .298** | .018   | .126**  | .533**  | .508** | 1      | .408** | .748** |
| SE  | .350** | .482** | .306** | .109** | .289**  | .248**  | .364** | .408** | 1      | .384** |
| PA  | .703** | .481** | .350** | -.092* | .147**  | .424**  | .525** | .748** | .384** | 1      |

**Table S4**

Pearson's Correlation Between the First Order YPI-R3 Constructs for Singapore Fathers Sample (*n*=592)

|     | OC     | EID    | UI     | OO     | NIG     | CSS     | IE     | DR     | SE     | PA     |
|-----|--------|--------|--------|--------|---------|---------|--------|--------|--------|--------|
| OC  | 1      | .334** | .237** | .072   | -.014   | .617**  | .481** | .715** | .295** | .726** |
| EID | .334** | 1      | .235** | -.076  | .420**  | .168**  | .234** | .412** | .473** | .442** |
| UI  | .237** | .235** | 1      | .017   | .462**  | .112**  | .365** | .278** | .249** | .276** |
| OO  | .072   | -.076  | .017   | 1      | -.021   | .189**  | .002   | .031   | .065   | -.044  |
| NIG | -.014  | .420** | .462** | -.021  | 1       | -.187** | .151** | .147** | .335** | .133** |
| CSS | .617** | .168** | .112** | .189** | -.187** | 1       | .335** | .555** | .179** | .460** |

|    |        |        |        |       |        |        |        |        |        |        |
|----|--------|--------|--------|-------|--------|--------|--------|--------|--------|--------|
| IE | .481** | .234** | .365** | .002  | .151** | .335** | 1      | .531** | .240** | .539** |
| DR | .715** | .412** | .278** | .031  | .147** | .555** | .531** | 1      | .343** | .742** |
| SE | .295** | .473** | .249** | .065  | .335** | .179** | .240** | .343** | 1      | .344** |
| PA | .726** | .442** | .276** | -.044 | .133** | .460** | .539** | .742** | .344** | 1      |

---

OC=Over-Control

EID=Emotional Inhibition and Deprivation

UI=Undependability and Irresponsibility

OO=Overprotection and Overindulgence

NIG=Neglect and Insufficient Guidance

CSS=Competitiveness and Status Seeking

IE=Intrusiveness and Exploitation

DR=Degradation and Rejection

SE=Social Exclusion

PA=Punitiveness and Abuse
